# Supplementary figures and images for: A nose-to-nose comparison of the physiological and molecular responses of rainbow trout to high environmental ammonia in seawater versus freshwater
Source: Oxford University Press journal article supplement (doi:10.1242/jeb.057802), 2011-10-12

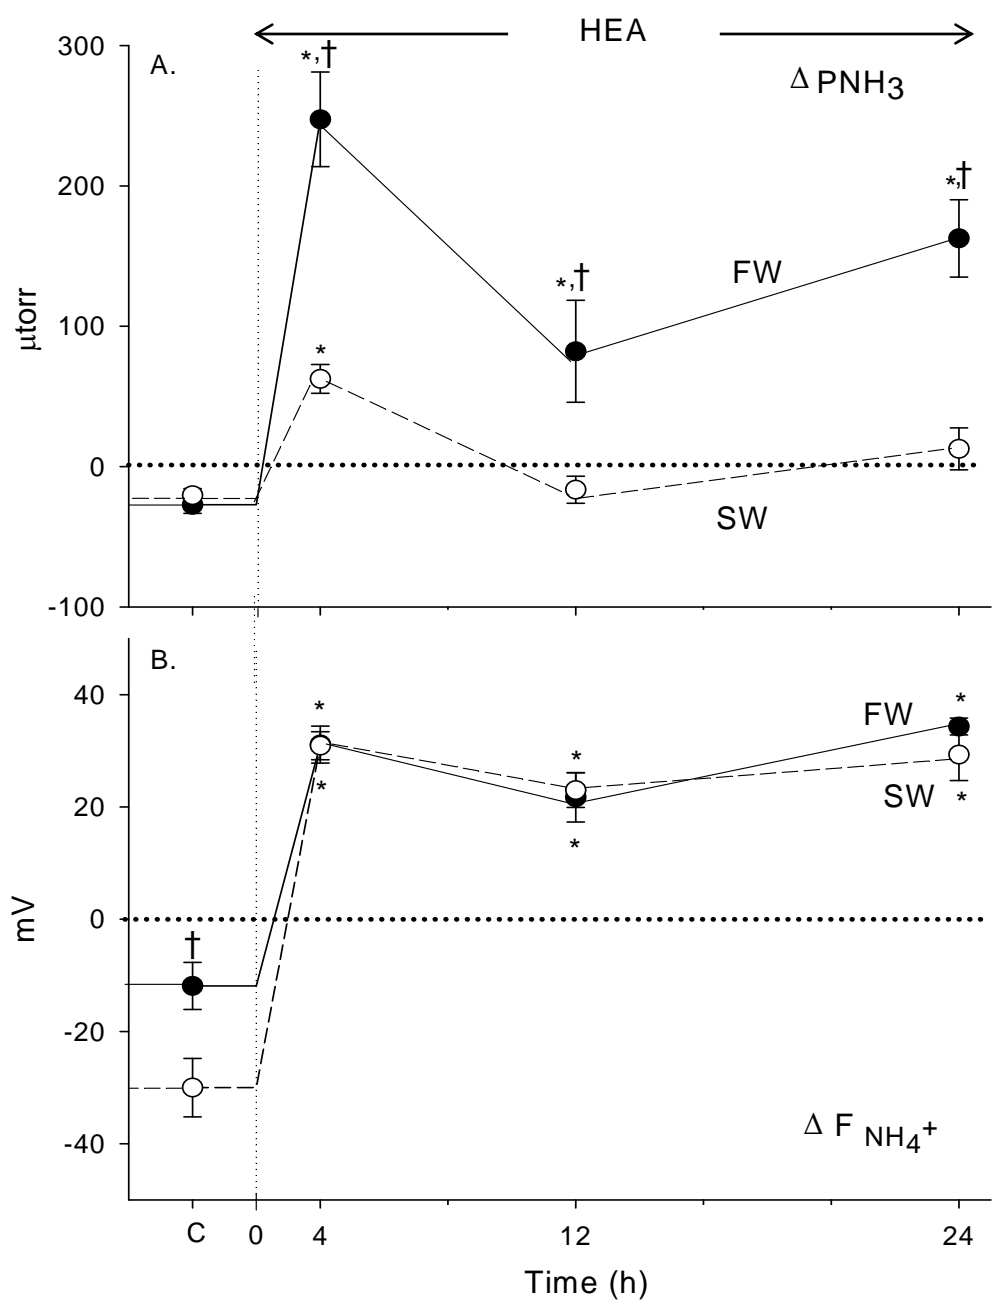

Supplement: jeb057802figs1.pdf [file jeb057802figs1.pdf]
